# Supplementary material for: Gata3 hypermethylation and Foxp3 hypomethylation are associated with sustained protection and bystander effect following epicutaneous immunotherapy in peanut‐sensitized mice
Source: PubMed Central journal article supplement — Allergy. 2018 Oct 8;74(1):152–64. doi: 10.1111/all.13479 (PMC6585762; doi:10.1111/all.13479), 2018-10-08

## 1 **Supplementary Materials and Methods**

2

### 3 ***T cell subtypes sorting by flow cytometry***

4 The spleens were prepared in a single-cell suspension and washed in RPMI-1640 (Gibco, Life  
5 Technologies, France). After red blood lysis, the splenocytes were washed three times in RPMI-1640.

6 (1) For Th1 and Th2 cell isolation, CD4<sup>+</sup> T cells were enriched by depletion (CD4<sup>+</sup> T cell isolation kit,  
7 MiltenyiBiotec, France) and were stimulated *in vitro* with a mix of PMA (50 ng/mL)/ionomycin (5  
8 µg/mL) for 2hrs 30 min at 37°C, 5% CO<sub>2</sub>. Then, Th1 and Th2 cells were sorted on a FACS ARIA (BD  
9 Biosciences, France) using anti-IFN $\gamma$ -BV421 (clone XMG1.2) and anti-IL-4-PE (clone BVD4-1D11)  
10 antibodies (respectively BD Biosciences and MiltenyiBiotec, France) after cell permeabilization using  
11 the Cytotfix/Cytoperm kit (BD Biosciences, France).

12 (2) CD4<sup>+</sup>CD25<sup>+</sup> T cells were sorted directly from the splenocytes using a CD4<sup>+</sup>CD25<sup>+</sup> Regulatory T  
13 Cell Isolation Kit (MiltenyiBiotec, France), according to the manufacturer's instructions. Then, CD62L<sup>+</sup>  
14 Tregs and CD62L<sup>-</sup> Tregs were sorted on a FACS ARIA (BD Biosciences, France) using CD62L-PE-  
15 Cy7 (clone MEL-14) and CD44-VioBlue (clone IM7) (respectively BD Biosciences and MiltenyiBiotec,  
16 France). The cells were counted and adjusted to inject 1x10<sup>6</sup> cells in 100 µL of phosphate-buffered saline  
17 intravenously into the retro-orbital plexus of the mice.

18 The sorting purity was ascertained by flow cytometry and was greater than 95%.

### 19 ***Sequencing of DNA methylation by bisulfite pyrosequencing***

20

21 DNA was extracted from purified cells with the DNA blood and tissue kit (Qiagen, Hilden, Germany)  
22 using the standard protocol given by the manufacturer. The quality of extracted DNA was controlled by  
23 Nanodrop and quantified using PicoGreen (ThermoFisher Scientific, Fontenay-sous-Bois, France).  
24 Quantitative DNA methylation analysis was performed by pyrosequencing of bisulfite treated DNA(25,  
25 26).

26 500ng of DNA was bisulfite converted using the EpiTect 96 Fast Bisulfite kit (Qiagen, Hilden,  
27 Germany) according to the manufacturer's instructions. Regions of interest were amplified using 30 ng  
28 of bisulfite treated mouse genomic DNA and 5 to 7.5 pmol of forward and reverse primer, one of them  
29 being biotinylated. Sequences for oligonucleotides for PCR amplification and pyrosequencing, genomic  
30 coordinates of the analyzed region and number of analyzed CpGs per pyrosequencing primer are given  
31 in Supplementary Table S1. Reaction conditions were 1x HotStar Taq buffer supplemented with 1.6  
32 mM MgCl<sub>2</sub>, 100 μM dNTPs and 2.0 U HotStar Taq polymerase (Qiagen) in a 25μl volume. The PCR  
33 program consisted of a denaturing step of 15 min at 95°C followed by 50 cycles of 30 s at 95°C, 30 s at  
34 the respective annealing temperature and 20 s at 72°C, with a final extension of 5 min at 72°C. 10 μl of  
35 PCR product were rendered single-stranded as previously described 25,26 and 4 pmol of the respective  
36 sequencing primer were used for analysis. Quantitative DNA methylation analysis was carried out on a  
37 PSQ 96MD system with the PyroGold SQA Reagent Kit (Qiagen) and results were analyzed using the  
38 PyroMark CpG software (V.1.0.11.14, Qiagen). The peak heights in the resulting output format, termed  
39 Pyrogram, were used to determine the methylation levels at individual CpGs. The methylation level was  
40 calculated as the ratio of the peaks corresponding to the methylated allele (Incorporation of C/G after  
41 bisulfite treatment) compared to the sum of the signals (peak height of the signal corresponding to the  
42 methylated alleles and the unmethylated alleles (incorporation of T/A after bisulfite treatment)) through  
43 the relative height of the peaks corresponding to the variable nucleotide positions. The average DNA  
44 methylation over all analysed CpGs in an amplification product was used for further statistical  
45 evaluation.

46

#### 47 ***Measurement of Gata3 mRNA expression***

48 mRNA expression of *Gata3* was analysed by qPCR using the following amplification  
49 primers: *Gata3* 5'-GAGGAGGAACGCTAATGG-3' and 5'-TTTCGATTGCTAGACATCTTC-  
50 3'. *Sdha*, *Actb* and *Ppia* were selected for normalization from a selection of 12 genes included in the  
51 Genorm mouse kit (PrimerDesign Ltd, Southhampton, UK) after evaluation of the stability of expression  
52 in the analyzed sample cohort. 135 ng of input RNA was used for the cDNA synthesis by reverse

53 transcription using SuperscriptIII and oligodT20 (ThermoFisher). 2.5  $\mu$ L of cDNA were used as input  
54 for the qPCR reaction (approximately 2.5 ng of cDNA by qPCR assay) using the LightCycler 480  
55 SYBR Green Master mix (Roche Molecular Diagnostics, Meylan France) on a Lightcycler 480 V2  
56 (Roche). Amplification was performed under the following conditions: 95°C for 10 min, 45  
57 amplification cycles at 95°C for 10s, 58°C for 10s and 72°C for 10s. The relative expression  
58 of *Gata3* was normalized to the geometric mean of the expression of the three reference genes, and  
59 calculated using the  $\Delta\Delta Cq$  method<sup>23</sup>.

60

### 61 ***Measurement of humoral responses***

62 Blood was collected after sensitization (day 43) and every 2 weeks during EPIT in EDTA-tubes to  
63 prepare plasma, which was subsequently used to titrate IgE, IgG1 and IgG2a specific to PPE or OVA.  
64 Specific antibodies were quantified using a semi-quantitative ELISA developed in-house(3). Microtiter  
65 plates were coated with 100  $\mu$ L per well of 5  $\mu$ g/mL peanut or OVA solution. Serial dilutions of 50  $\mu$ L  
66 of each plasma were dispensed per well and incubated for 24 h at 4°C. A polyclonal anti-mouse IgE  
67 (STAR110A), IgG1 (STAR132A) or IgG2a (STAR82A) antibody labeled with alkaline phosphatase  
68 (Biorad, France) was used as an enzyme tracer. Reagent (pNPP, Sigma, France) was used as an enzyme  
69 substrate. Specific IgE, IgG1 and IgG2a were quantified by comparison with concentration-response  
70 curves obtained with a total IgE, IgG2a or IgG1 assay performed under identical conditions using a solid  
71 phase coated with a monoclonal anti-mouse IgE (clone LO-ME-3) or IgG2a (clone LO-MG2-9)  
72 antibody or a polyclonal anti-mouse IgG (STAR8B) antibody (Biorad).

### 73 ***Cellular responses in spleen***

74 After treatment, half of the splenocytes were used for *in vitro* reactivation with PPE. Cells ( $2 \times 10^6$  cells  
75 per well) were incubated in a 24-well microtiter plate in medium alone or with PPE(12). Supernatants  
76 were harvested after 72 hrs and analyzed for the presence of cytokines (Il4, Il5, Il13, Il10, Ifn $\gamma$ ) using a  
77 Bio-Plex<sup>®</sup> system (Biorad, Marnes-la-Coquette, France) according to the manufacturer's instructions.  
78 The remaining splenocytes were used for the analysis of regulatory T cells just after harvesting using

79 the combination of the following antibodies: anti-mouse CD4-PerCP-Cy5.5, CD25-FITC (all from BD  
80 Biosciences, Le Pont de Claix, France) and Foxp3-APC (from e-Bioscience, San Diego, USA) or control  
81 isotype(12). Flow cytometry was performed on Guava<sup>®</sup> easycyte (Millipore, Guyancourt, France) and  
82 analysed using the FlowJo software (TreeStar Inc., Ashland, USA).

**Supplementary TABLE**

**Table S1. Primer sequences used in quantitative real time-PCR assays**

| <b>Gene</b>                                                             | <b>Size</b> | <b>PCR primer forward</b>  | <b>PCR primer reverse</b>                | <b>Pyrosequencing primer(s)</b> | <b>CpGs</b> |
|-------------------------------------------------------------------------|-------------|----------------------------|------------------------------------------|---------------------------------|-------------|
| <b><i>Foxp3</i></b><br>(NM_054039)<br>chrX:7,583,912-<br>7,584,196      | 285         | GGTTTTGTTGTTATAATTTGAATTTG | Biotin-<br>CAACCTTAAACCCCTCTAACATC       | TGTTGTTATAATTTGAATTT            | 1-4         |
|                                                                         |             |                            |                                          | GGGGTAGATAATTTATTTTA            | 5-6         |
|                                                                         |             |                            |                                          | GGTGATGTGGGTGTTAG               | 8-10        |
| <b><i>Gata3</i></b><br>(NM_008091)<br>chr2:9,874,604-<br>9,874,867      | 264         | ATTTGATATTTGAGGTATTTTTTTT  | Biotin-<br>CAAAACCCTAAACAACCACCA         | TTTTTATTTTGTGTTGGT              | 1-10        |
|                                                                         |             |                            |                                          | TGAGGATTGGAGTGGT                | 11-16       |
| <b><i>Gata3</i></b><br>(NM_008091)<br>chr2:9,881,049-<br>9,881,243      | 195         | ATTGGATTTAGTTGTAGGGGTAT    | Biotin-<br>CCCCTCCCCTACTCTATATTTCTA<br>A | GGGTATTTAATATGTAATTT            | 1-3         |
|                                                                         |             |                            |                                          | GGGTAATTGGGAAAGAG               | 4-13        |
| <b><i>Tbx21</i></b><br>(NM_019507.2)<br>chr11:97,114,687-<br>97,114,901 | 215         | GGTTGAATTTGGATTATAATAGGTG  | Biotin-<br>AACTCAAATAACTAACTTTCCC        | GGATTATAATAGGTGGTTGT            | 1-8         |
|                                                                         |             |                            |                                          | AGGGGTAGGGTAGTTATTTA            | 13-21       |
| <b><i>Rorc</i></b><br>(NM_011281.3)<br>chr3:94,372,824-<br>94,373,073   | 250         | TTTTGGGTTTTGTTTTTTGTTTT    | Biotin-<br>TACTCTATCTACCAATCCATCTCC<br>C | TTTTTGGGTAGTTAGGGTA             | 2-3         |
|                                                                         |             |                            |                                          | GGGGTTTTAGAGGAGG                | 4           |
| <b><i>Rorc</i></b><br>(NM_011281.3)<br>chr3:94,377,454-<br>94,377,718   | 265         | TTGTTTAGAAATATTGGGGGAGAG   | Biotin-<br>CTAAAACACACCCTACCAAAAA<br>AAC | TTGTGTAGATTTAAGGGTTG            | 1           |
|                                                                         |             |                            |                                          | AGTAAGTGAATGGGGGT               | 2-4         |

Supplementary Figure S1

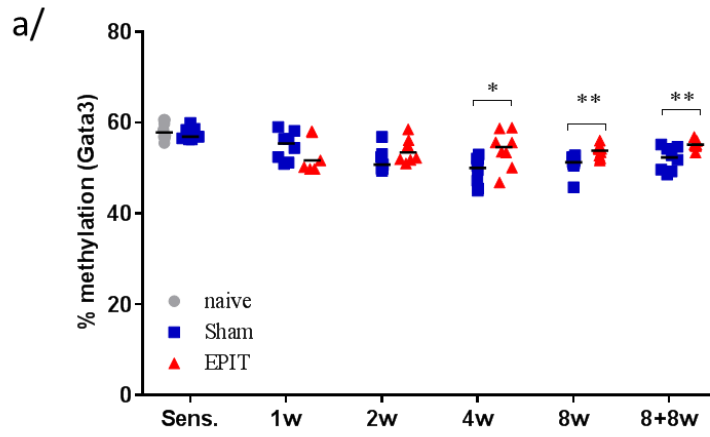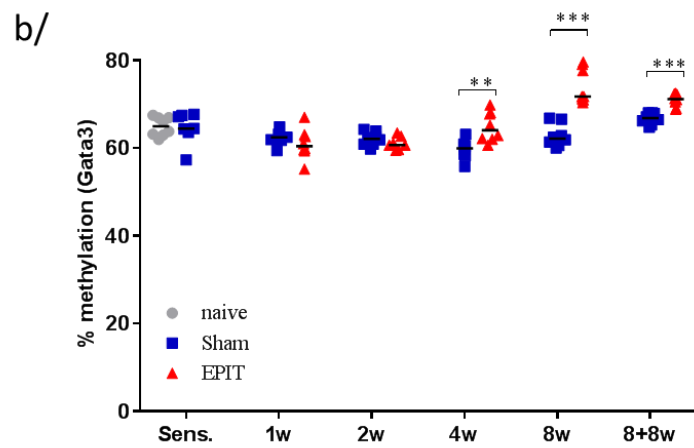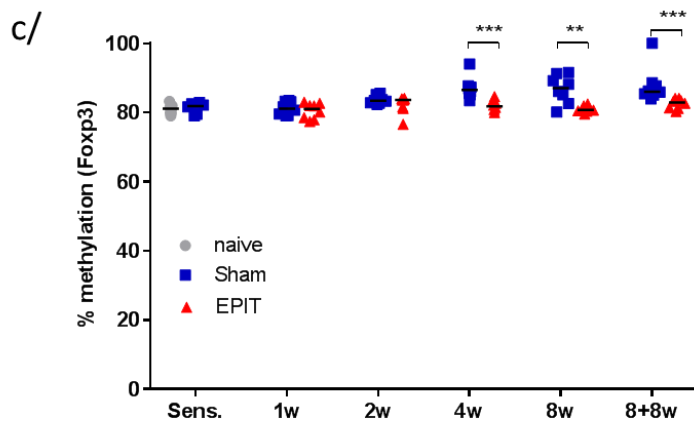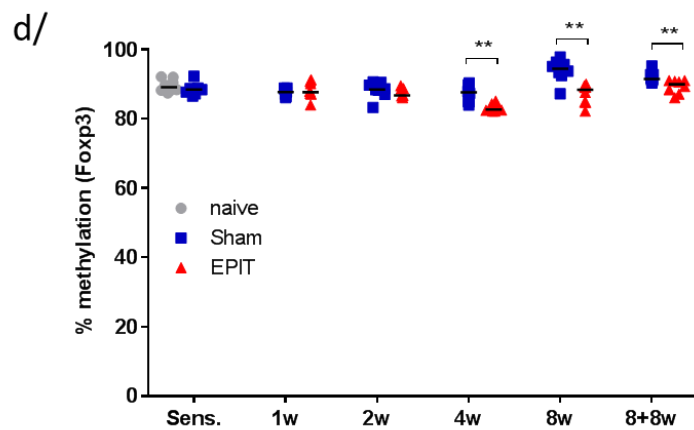

## Supplementary Figure S2

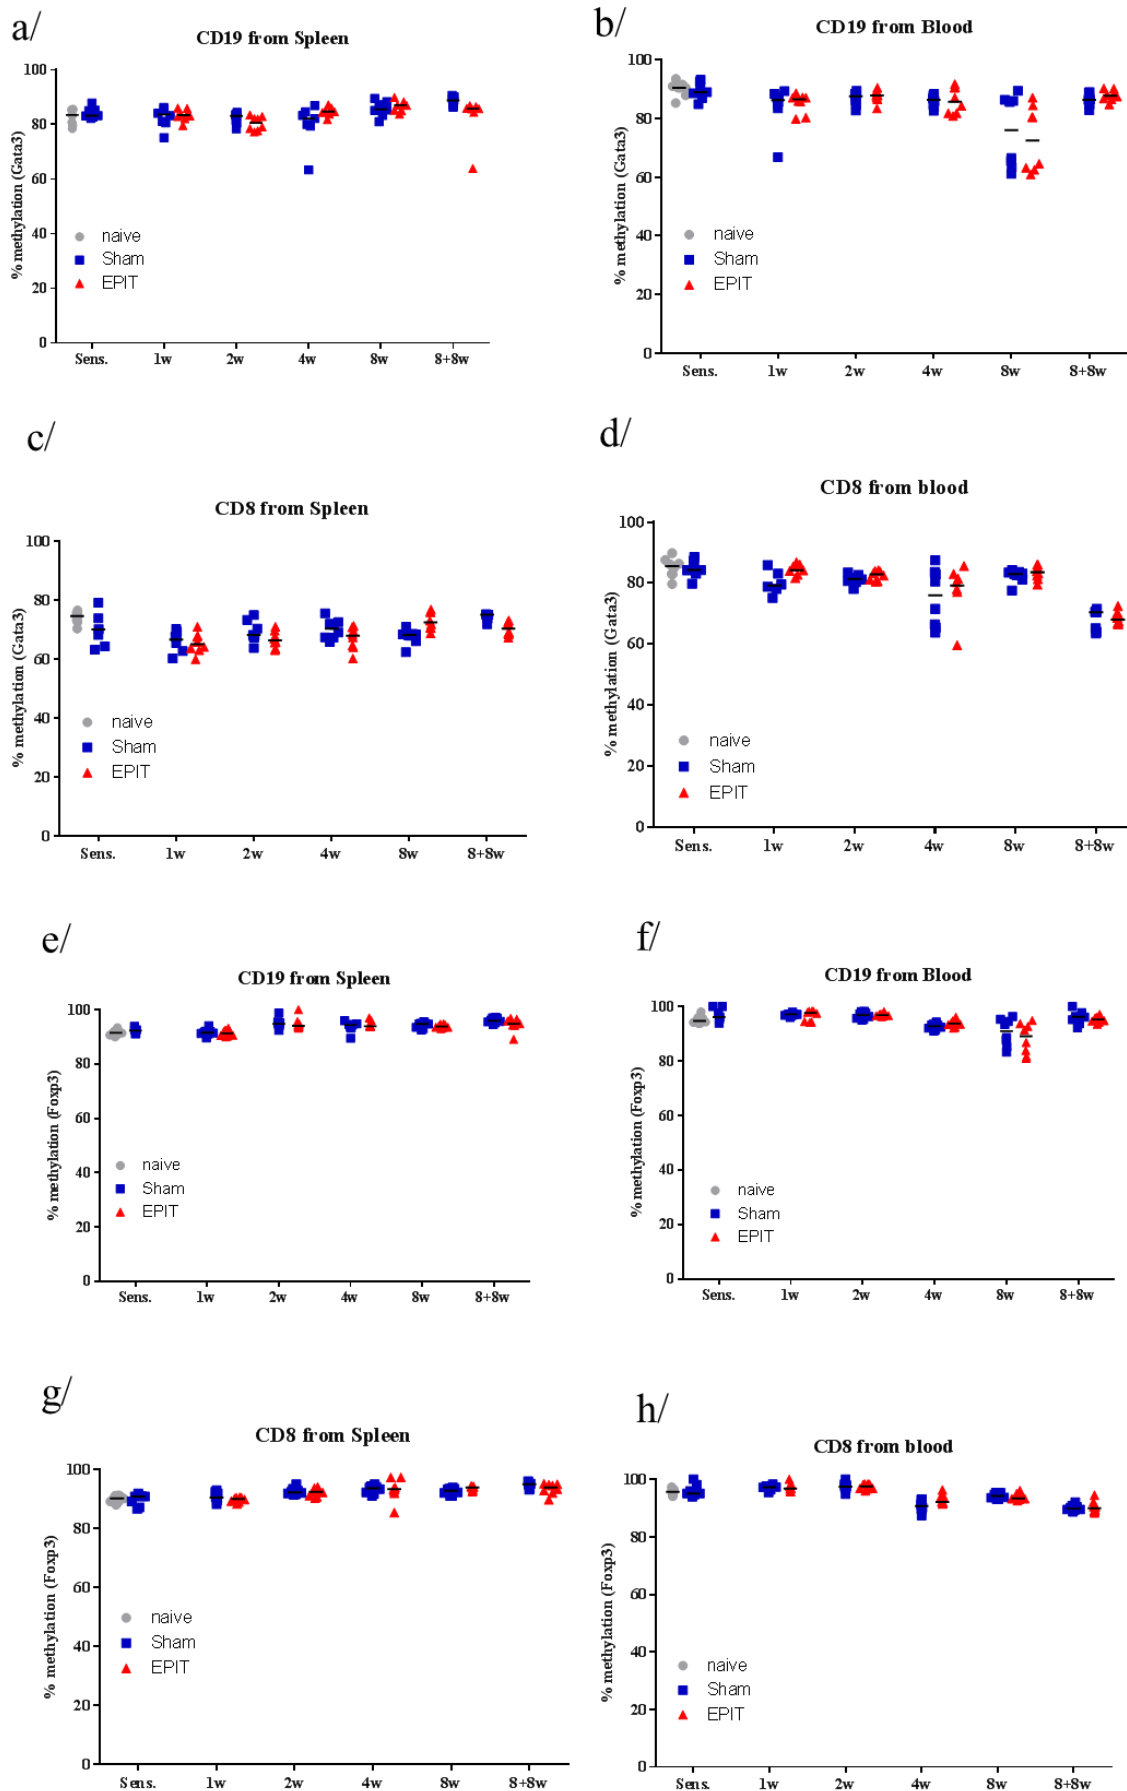

### Supplementary Figure S3

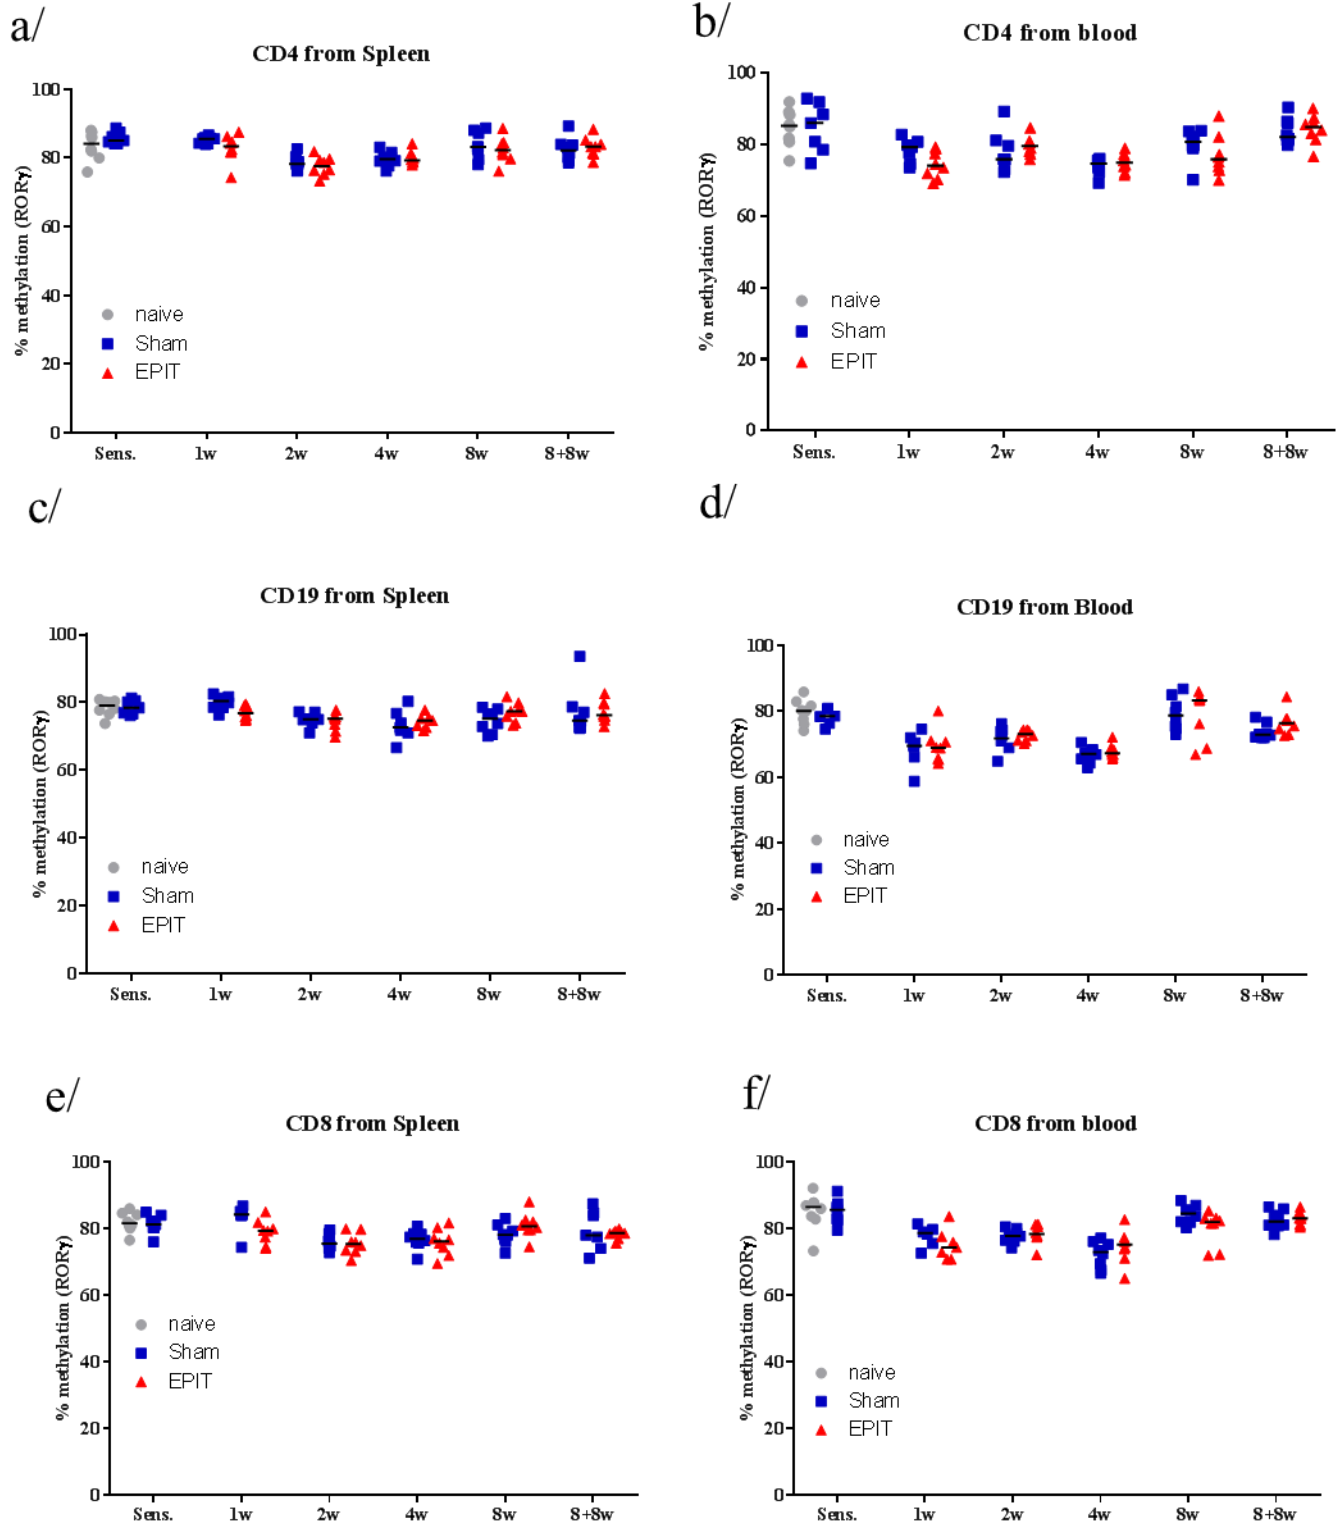



### Supplementary Figure S4

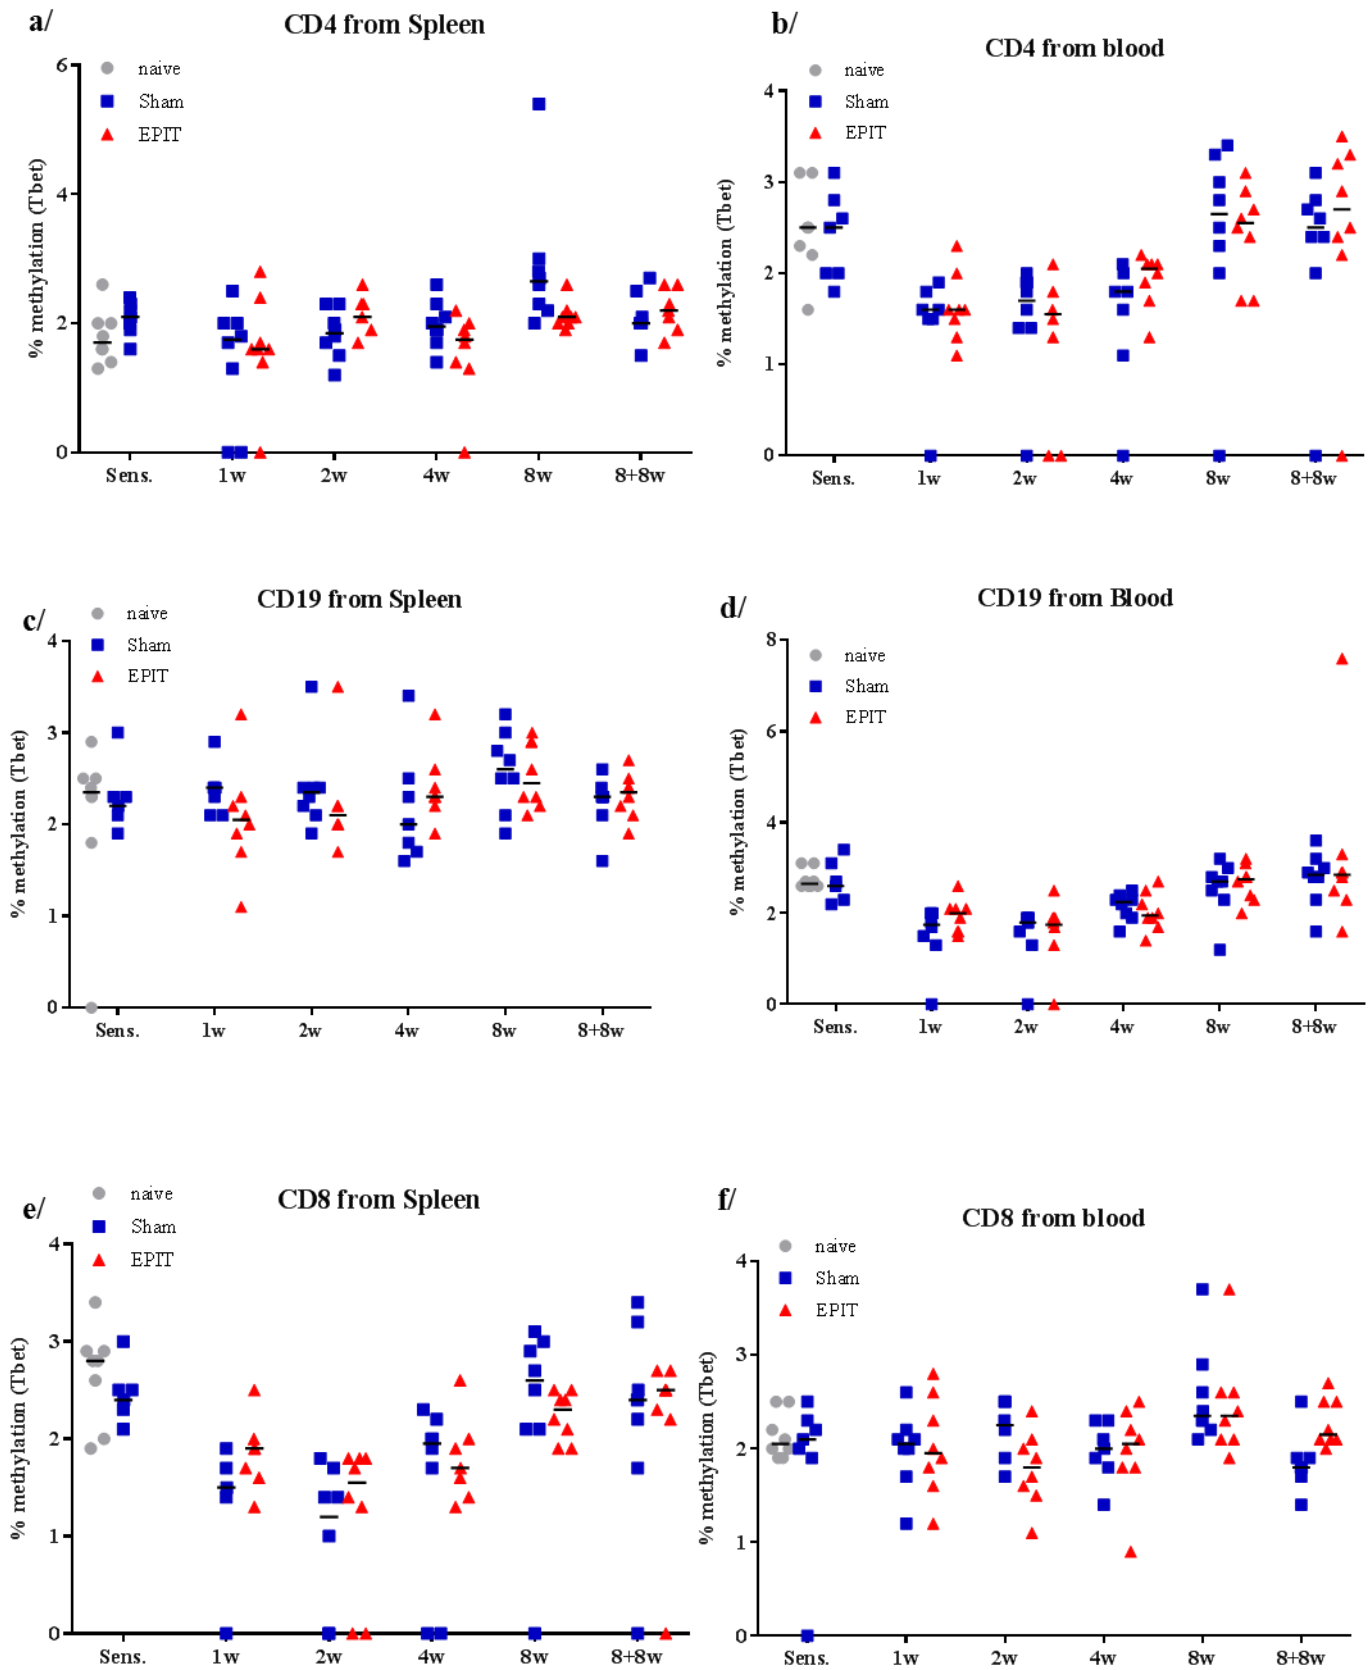

### Supplementary Figure S5

a/

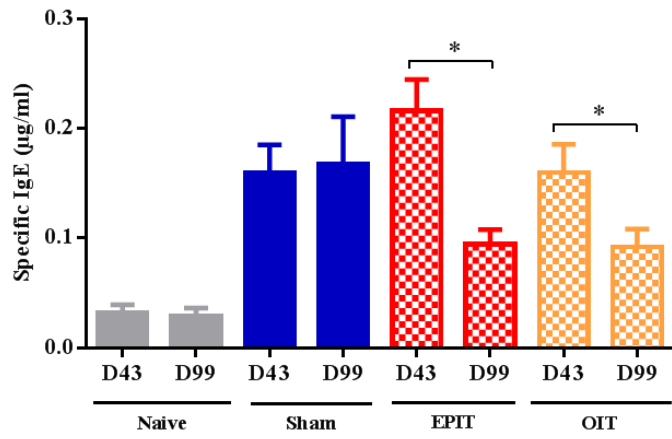

b/

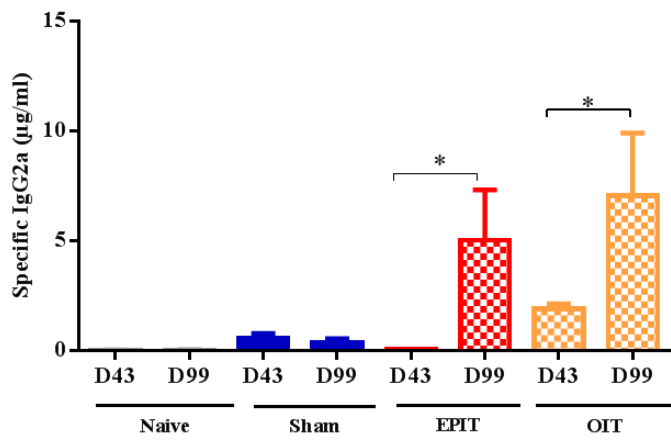

Supplement: ALL-74-152-s001.pdf [file ALL-74-152-s001.pdf]
